# Supplementary material for: Amerindian genetic ancestry as a risk factor for tuberculosis in an amazonian population
Source: PubMed Central journal article supplement (PMC7365596; doi:10.1371/journal.pone.0236033), 2020-07-16
Supplement: pone.0236033.s002.pdf [file pone.0236033.s002.pdf]

| SAMPLE | GROUP | AGE | SEX | AFRICAN | EUROPEAN | AMERINDIAN |
|--------|-------|-----|-----|---------|----------|------------|
| TB01   | 1     | 42  | 0   | 0.570   | 0.227    | 0.203      |
| TB02   | 1     | 71  | 1   | 0.387   | 0.351    | 0.261      |
| TB03   | 1     | 55  | 1   | 0.157   | 0.393    | 0.450      |
| TB04   | 1     | 63  | 1   | 0.174   | 0.611    | 0.215      |
| TB05   | 1     | 39  | 1   | 0.340   | 0.519    | 0.141      |
| TB06   | 1     | 39  | 0   | 0.413   | 0.317    | 0.270      |
| TB07   | 1     | 7   | 1   | 0.279   | 0.475    | 0.245      |
| TB08   | 1     | NA  | 0   | 0.141   | 0.639    | 0.220      |
| TB09   | 1     | 47  | 1   | 0.230   | 0.537    | 0.234      |
| TB10   | 1     | NA  | 1   | 0.176   | 0.614    | 0.210      |
| TB11   | 1     | 66  | 0   | 0.126   | 0.575    | 0.299      |
| TB12   | 1     | 42  | 1   | 0.164   | 0.331    | 0.505      |
| TB13   | 1     | 55  | 0   | 0.249   | 0.388    | 0.362      |
| TB14   | 1     | 85  | 1   | 0.636   | 0.147    | 0.217      |
| TB15   | 1     | 84  | 1   | 0.156   | 0.515    | 0.329      |
| TB16   | 1     | 64  | 0   | 0.327   | 0.397    | 0.276      |
| TB17   | 1     | 37  | 0   | 0.168   | 0.270    | 0.561      |
| TB18   | 1     | NA  | 1   | 0.170   | 0.375    | 0.454      |
| TB19   | 1     | 5   | 0   | 0.210   | 0.549    | 0.241      |
| TB20   | 1     | 59  | 1   | 0.100   | 0.317    | 0.583      |
| TB21   | 1     | NA  | 1   | 0.147   | 0.566    | 0.287      |
| TB22   | 1     | 35  | 0   | 0.353   | 0.272    | 0.374      |
| TB23   | 1     | 37  | 0   | 0.315   | 0.525    | 0.160      |
| TB24   | 1     | 36  | 0   | 0.314   | 0.361    | 0.325      |
| TB25   | 1     | NA  | 0   | 0.290   | 0.114    | 0.596      |
| TB26   | 1     | 71  | 0   | 0.194   | 0.403    | 0.404      |
| TB27   | 1     | 88  | 1   | 0.101   | 0.366    | 0.533      |
| TB28   | 1     | 59  | 1   | 0.342   | 0.310    | 0.348      |
| TB29   | 1     | 56  | 1   | 0.127   | 0.359    | 0.514      |
| TB30   | 1     | 55  | 0   | 0.511   | 0.216    | 0.273      |
| TB31   | 1     | 55  | 0   | 0.276   | 0.561    | 0.163      |
| TB32   | 1     | 59  | 0   | 0.112   | 0.349    | 0.539      |
| TB33   | 1     | 28  | 0   | 0.213   | 0.394    | 0.393      |
| TB34   | 1     | 8   | 0   | 0.280   | 0.451    | 0.269      |
| TB35   | 1     | 25  | 0   | 0.171   | 0.686    | 0.143      |
| TB36   | 1     | 48  | 1   | 0.264   | 0.482    | 0.254      |
| TB37   | 1     | 28  | 1   | 0.240   | 0.471    | 0.290      |
| TB38   | 1     | 83  | 0   | 0.330   | 0.377    | 0.293      |
| TB39   | 1     | NA  | 0   | 0.331   | 0.343    | 0.325      |
| TB40   | 1     | 61  | 1   | 0.182   | 0.435    | 0.383      |
| TB41   | 1     | 63  | 0   | 0.177   | 0.375    | 0.448      |
| TB42   | 1     | 36  | 1   | 0.184   | 0.571    | 0.244      |
| TB43   | 1     | 44  | 1   | 0.236   | 0.478    | 0.286      |
| TB44   | 1     | 6   | 1   | 0.199   | 0.299    | 0.503      |
| TB45   | 1     | 7   | 0   | 0.323   | 0.437    | 0.241      |
| TB46   | 1     | 38  | 1   | 0.152   | 0.396    | 0.451      |
| TB47   | 1     | 62  | 0   | 0.115   | 0.295    | 0.590      |

|      |   |    |   |       |       |       |
|------|---|----|---|-------|-------|-------|
| TB48 | 1 | 72 | 1 | 0.131 | 0.400 | 0.469 |
| TB49 | 1 | 63 | 1 | 0.190 | 0.450 | 0.361 |
| TB50 | 1 | 77 | 0 | 0.266 | 0.468 | 0.265 |
| TB51 | 1 | 3  | 1 | 0.231 | 0.459 | 0.310 |
| TB52 | 1 | 55 | 1 | 0.317 | 0.276 | 0.407 |
| TB53 | 1 | 38 | 1 | 0.071 | 0.267 | 0.662 |
| TB54 | 1 | 48 | 1 | 0.195 | 0.550 | 0.255 |
| TB55 | 1 | 64 | 0 | 0.252 | 0.260 | 0.488 |
| TB56 | 1 | 28 | 1 | 0.168 | 0.541 | 0.291 |
| TB57 | 1 | 45 | 0 | 0.257 | 0.580 | 0.163 |
| TB58 | 1 | 65 | 1 | 0.437 | 0.325 | 0.238 |
| TB59 | 1 | 21 | 0 | 0.193 | 0.590 | 0.217 |
| TB60 | 1 | 47 | 1 | 0.214 | 0.491 | 0.295 |
| TB61 | 1 | 57 | 1 | 0.122 | 0.509 | 0.369 |
| TB62 | 1 | 54 | 0 | 0.139 | 0.695 | 0.166 |
| TB63 | 1 | 88 | 1 | 0.376 | 0.362 | 0.262 |
| TB64 | 1 | 52 | 1 | 0.371 | 0.395 | 0.234 |
| TB65 | 1 | 61 | 1 | 0.256 | 0.194 | 0.550 |
| TB66 | 1 | 31 | 0 | 0.220 | 0.538 | 0.243 |
| TB67 | 1 | 57 | 0 | 0.645 | 0.162 | 0.192 |
| TB68 | 1 | 33 | 1 | 0.252 | 0.476 | 0.272 |
| TB69 | 1 | NA | 1 | 0.364 | 0.433 | 0.203 |
| TB70 | 1 | NA | 1 | 0.340 | 0.454 | 0.205 |
| TB71 | 1 | 68 | 0 | 0.125 | 0.520 | 0.354 |
| TB72 | 1 | 29 | 0 | 0.299 | 0.529 | 0.173 |
| TB73 | 1 | 45 | 1 | 0.220 | 0.544 | 0.237 |
| TB74 | 1 | 44 | 1 | 0.381 | 0.254 | 0.365 |
| TB75 | 1 | 48 | 0 | 0.328 | 0.276 | 0.396 |
| TB76 | 1 | 42 | 1 | 0.307 | 0.488 | 0.204 |
| TB77 | 1 | 52 | 0 | 0.185 | 0.334 | 0.481 |
| TB78 | 1 | 53 | 1 | 0.672 | 0.137 | 0.191 |
| TB79 | 1 | 31 | 1 | 0.285 | 0.523 | 0.192 |
| TB80 | 1 | 23 | 1 | 0.127 | 0.414 | 0.459 |
| TB81 | 1 | 45 | 0 | 0.156 | 0.443 | 0.401 |
| TB82 | 1 | 49 | 0 | 0.270 | 0.527 | 0.203 |
| TB83 | 1 | 24 | 0 | 0.168 | 0.416 | 0.416 |
| TB84 | 1 | 67 | 0 | 0.307 | 0.425 | 0.268 |
| TB85 | 1 | 5  | 1 | 0.108 | 0.781 | 0.111 |
| TB86 | 1 | 62 | 1 | 0.150 | 0.645 | 0.204 |
| TB87 | 1 | 38 | 1 | 0.343 | 0.260 | 0.397 |
| TB88 | 1 | 51 | 1 | 0.102 | 0.530 | 0.368 |
| TB89 | 1 | 44 | 0 | 0.244 | 0.394 | 0.362 |
| TB90 | 1 | 49 | 0 | 0.210 | 0.586 | 0.204 |
| TB91 | 1 | 7  | 0 | 0.249 | 0.316 | 0.434 |
| TB92 | 1 | 35 | 1 | 0.194 | 0.436 | 0.370 |
| TB93 | 1 | 27 | 1 | 0.410 | 0.448 | 0.142 |
| TB94 | 1 | NA | 0 | 0.249 | 0.315 | 0.436 |
| TB95 | 1 | 47 | 0 | 0.217 | 0.324 | 0.459 |

|       |   |    |   |       |       |       |
|-------|---|----|---|-------|-------|-------|
| TB96  | 1 | 34 | 1 | 0.573 | 0.318 | 0.109 |
| TB97  | 1 | 46 | 1 | 0.143 | 0.465 | 0.392 |
| TB98  | 1 | 48 | 1 | 0.414 | 0.162 | 0.425 |
| TB99  | 1 | 51 | 1 | 0.350 | 0.447 | 0.203 |
| TB100 | 1 | 72 | 0 | 0.186 | 0.228 | 0.587 |
| TB101 | 1 | 32 | 0 | 0.133 | 0.562 | 0.305 |
| TB102 | 1 | 5  | 1 | 0.300 | 0.435 | 0.265 |
| TB103 | 1 | 45 | 0 | 0.094 | 0.358 | 0.548 |
| TB104 | 1 | 5  | 0 | 0.267 | 0.574 | 0.159 |
| TB105 | 1 | NA | 0 | 0.230 | 0.207 | 0.563 |
| TB106 | 1 | 65 | 0 | 0.162 | 0.383 | 0.455 |
| TB107 | 1 | 46 | 0 | 0.166 | 0.327 | 0.507 |
| TB108 | 1 | 4  | 1 | 0.097 | 0.581 | 0.322 |
| TB109 | 1 | 56 | 1 | 0.143 | 0.444 | 0.413 |
| TB110 | 1 | 32 | 0 | 0.209 | 0.388 | 0.402 |
| TB111 | 1 | 51 | 1 | 0.170 | 0.440 | 0.390 |
| TB112 | 1 | 84 | 0 | 0.115 | 0.762 | 0.123 |
| TB113 | 1 | 26 | 0 | 0.153 | 0.463 | 0.383 |
| TB114 | 1 | 66 | 0 | 0.126 | 0.303 | 0.570 |
| TB115 | 1 | 25 | 1 | 0.180 | 0.222 | 0.597 |
| TB116 | 1 | 49 | 0 | 0.107 | 0.554 | 0.338 |
| TB117 | 1 | 77 | 0 | 0.221 | 0.388 | 0.391 |
| TB118 | 1 | 54 | 0 | 0.221 | 0.517 | 0.262 |
| TB119 | 1 | 55 | 0 | 0.228 | 0.349 | 0.423 |
| TB120 | 1 | 59 | 0 | 0.102 | 0.486 | 0.412 |
| TB121 | 1 | 34 | 1 | 0.285 | 0.207 | 0.508 |
| TB122 | 1 | 5  | 0 | 0.378 | 0.468 | 0.153 |
| TB123 | 1 | NA | 1 | 0.241 | 0.149 | 0.610 |
| TB124 | 1 | 39 | 1 | 0.428 | 0.275 | 0.297 |
| TB125 | 1 | 85 | 1 | 0.302 | 0.454 | 0.244 |
| TB126 | 1 | 57 | 1 | 0.090 | 0.503 | 0.407 |
| TB127 | 1 | NA | 1 | 0.364 | 0.290 | 0.345 |
| TB128 | 1 | 19 | 1 | 0.551 | 0.282 | 0.167 |
| TB129 | 1 | 43 | 0 | 0.228 | 0.438 | 0.333 |
| TB130 | 1 | 53 | 0 | 0.186 | 0.344 | 0.470 |
| TB131 | 1 | 79 | 1 | 0.260 | 0.411 | 0.328 |
| TB132 | 1 | 36 | 0 | 0.231 | 0.462 | 0.307 |
| TB133 | 1 | 38 | 0 | 0.334 | 0.465 | 0.200 |
| TB134 | 1 | 6  | 0 | 0.249 | 0.556 | 0.195 |
| TB135 | 1 | 27 | 1 | 0.124 | 0.653 | 0.223 |
| TB136 | 1 | 51 | 1 | 0.347 | 0.416 | 0.237 |
| TB137 | 1 | NA | 0 | 0.135 | 0.303 | 0.561 |
| TB138 | 1 | 47 | 0 | 0.16  | 0.447 | 0.393 |
| TB139 | 1 | 26 | 0 | 0.168 | 0.424 | 0.408 |
| TB140 | 1 | NA | 0 | 0.16  | 0.487 | 0.354 |
| TB141 | 1 | NA | 0 | 0.195 | 0.519 | 0.286 |
| TB142 | 1 | 35 | 1 | 0.579 | 0.174 | 0.247 |
| TB143 | 1 | 27 | 0 | 0.19  | 0.622 | 0.188 |

|       |   |    |   |       |       |       |
|-------|---|----|---|-------|-------|-------|
| TB144 | 1 | 35 | 0 | 0.178 | 0.604 | 0.217 |
| TB145 | 1 | 29 | 1 | 0.103 | 0.522 | 0.375 |
| TB146 | 1 | 43 | 1 | 0.116 | 0.409 | 0.475 |
| TB147 | 1 | NA | 0 | 0.258 | 0.605 | 0.137 |
| TB148 | 1 | NA | 0 | 0.422 | 0.279 | 0.299 |
| TB149 | 1 | 73 | 1 | 0.241 | 0.495 | 0.264 |
| TB150 | 1 | NA | 0 | 0.227 | 0.529 | 0.245 |
| TB151 | 1 | 7  | 1 | 0.392 | 0.17  | 0.438 |
| TB152 | 1 | 59 | 1 | 0.237 | 0.637 | 0.126 |
| TB153 | 1 | 72 | 1 | 0.11  | 0.55  | 0.34  |
| TB154 | 1 | NA | 1 | 0.163 | 0.618 | 0.219 |
| TB155 | 1 | 54 | 0 | 0.353 | 0.435 | 0.212 |
| TB156 | 1 | 69 | 1 | 0.174 | 0.598 | 0.228 |
| TB157 | 1 | 77 | 0 | 0.188 | 0.547 | 0.266 |
| TB158 | 1 | NA | 0 | 0.162 | 0.537 | 0.301 |
| TB159 | 1 | 66 | 0 | 0.449 | 0.294 | 0.257 |
| TB160 | 1 | 45 | 0 | 0.395 | 0.237 | 0.367 |
| TB161 | 1 | 66 | 1 | 0.455 | 0.264 | 0.282 |
| TB162 | 1 | NA | 0 | 0.318 | 0.521 | 0.161 |
| TB163 | 1 | NA | 0 | 0.141 | 0.386 | 0.473 |
| TB164 | 1 | 25 | 1 | 0.183 | 0.297 | 0.52  |
| TB165 | 1 | 46 | 0 | 0.224 | 0.291 | 0.485 |
| TB166 | 1 | NA | 0 | 0.322 | 0.323 | 0.355 |
| TB167 | 1 | NA | 0 | 0.308 | 0.513 | 0.179 |
| TB168 | 1 | NA | 0 | 0.182 | 0.601 | 0.217 |
| TB169 | 1 | NA | 0 | 0.235 | 0.374 | 0.392 |
| TB170 | 1 | 64 | 0 | 0.192 | 0.367 | 0.441 |
| TB171 | 1 | 27 | 0 | 0.22  | 0.336 | 0.444 |
| TB172 | 1 | 74 | 0 | 0.218 | 0.611 | 0.171 |
| TB173 | 1 | 38 | 0 | 0.202 | 0.355 | 0.443 |
| TB174 | 1 | 51 | 1 | 0.299 | 0.302 | 0.399 |
| TB175 | 1 | NA | 0 | 0.205 | 0.465 | 0.329 |
| TB176 | 1 | 51 | 0 | 0.227 | 0.392 | 0.381 |
| TB177 | 1 | 35 | 0 | 0.299 | 0.387 | 0.314 |
| TB178 | 1 | NA | 0 | 0.3   | 0.312 | 0.389 |
| TB179 | 1 | NA | 0 | 0.193 | 0.637 | 0.169 |
| TB180 | 1 | 6  | 0 | 0.334 | 0.438 | 0.228 |
| TB181 | 1 | 51 | 0 | 0.512 | 0.21  | 0.278 |
| TB182 | 1 | 76 | 1 | 0.276 | 0.385 | 0.338 |
| TB183 | 1 | 53 | 1 | 0.357 | 0.29  | 0.353 |
| TB184 | 1 | 66 | 0 | 0.218 | 0.629 | 0.154 |
| TB185 | 1 | NA | 1 | 0.444 | 0.305 | 0.251 |
| TB186 | 1 | NA | 0 | 0.415 | 0.256 | 0.329 |
| TB187 | 1 | 48 | 1 | 0.159 | 0.362 | 0.48  |
| TB188 | 1 | NA | 0 | 0.155 | 0.397 | 0.448 |
| TB189 | 1 | 29 | 0 | 0.208 | 0.438 | 0.354 |
| TB190 | 1 | NA | 0 | 0.193 | 0.288 | 0.519 |
| TB191 | 1 | NA | 1 | 0.119 | 0.478 | 0.402 |

|       |   |    |   |       |       |       |
|-------|---|----|---|-------|-------|-------|
| TB192 | 1 | NA | 1 | 0.257 | 0.261 | 0.481 |
| TB193 | 1 | 4  | 1 | 0.318 | 0.47  | 0.212 |
| TB194 | 1 | 53 | 1 | 0.288 | 0.452 | 0.26  |
| TB195 | 1 | NA | 0 | 0.161 | 0.43  | 0.409 |
| TB196 | 1 | 6  | 1 | 0.149 | 0.379 | 0.472 |
| TB197 | 1 | NA | 0 | 0.290 | 0.266 | 0.444 |
| TB198 | 1 | NA | 1 | 0.101 | 0.294 | 0.605 |
| TB199 | 1 | 5  | 1 | 0.139 | 0.309 | 0.552 |
| TB200 | 1 | 43 | 1 | 0.235 | 0.342 | 0.423 |
| TB201 | 1 | 69 | 1 | 0.259 | 0.369 | 0.371 |
| TB202 | 1 | 52 | 1 | 0.356 | 0.406 | 0.238 |
| TB203 | 1 | NA | 0 | 0.305 | 0.423 | 0.273 |
| TB204 | 1 | 45 | 0 | 0.289 | 0.512 | 0.199 |
| TB205 | 1 | 57 | 0 | 0.153 | 0.338 | 0.509 |
| TB206 | 1 | 27 | 0 | 0.219 | 0.396 | 0.386 |
| TB207 | 1 | 61 | 1 | 0.618 | 0.226 | 0.156 |
| TB208 | 1 | NA | 0 | 0.148 | 0.598 | 0.253 |
| TB209 | 1 | 55 | 0 | 0.405 | 0.379 | 0.216 |
| TB210 | 1 | NA | 1 | 0.332 | 0.168 | 0.500 |
| TB211 | 1 | 89 | 0 | 0.204 | 0.422 | 0.375 |
| TB212 | 1 | NA | 0 | 0.131 | 0.368 | 0.501 |
| TB213 | 1 | 77 | 1 | 0.385 | 0.149 | 0.466 |
| TB214 | 1 | NA | 0 | 0.592 | 0.220 | 0.187 |
| TB215 | 1 | NA | 1 | 0.451 | 0.354 | 0.195 |
| TB216 | 1 | NA | 0 | 0.451 | 0.404 | 0.145 |
| TB217 | 1 | NA | 1 | 0.454 | 0.380 | 0.166 |
| TB218 | 1 | NA | 0 | 0.129 | 0.547 | 0.324 |
| TB219 | 1 | 54 | 1 | 0.335 | 0.336 | 0.329 |
| TB220 | 1 | NA | 0 | 0.402 | 0.312 | 0.287 |
| TB221 | 1 | 82 | 1 | 0.214 | 0.518 | 0.268 |
| TB222 | 1 | NA | 1 | 0.137 | 0.332 | 0.531 |
| TB223 | 1 | NA | 1 | 0.091 | 0.301 | 0.608 |
| TB224 | 1 | 72 | 0 | 0.164 | 0.350 | 0.486 |
| TB225 | 1 | NA | 0 | 0.176 | 0.342 | 0.482 |
| TB226 | 1 | NA | 1 | 0.284 | 0.418 | 0.299 |
| TB227 | 1 | NA | 0 | 0.207 | 0.227 | 0.567 |
| TB228 | 1 | NA | 1 | 0.156 | 0.382 | 0.462 |
| TB229 | 1 | NA | 0 | 0.371 | 0.332 | 0.297 |
| TB230 | 1 | 3  | 0 | 0.406 | 0.284 | 0.310 |
| TB231 | 1 | 67 | 0 | 0.372 | 0.437 | 0.191 |
| TB232 | 1 | NA | 0 | 0.426 | 0.231 | 0.343 |
| TB233 | 1 | 53 | 0 | 0.175 | 0.597 | 0.228 |
| TB234 | 1 | 28 | 0 | 0.121 | 0.394 | 0.485 |
| TB235 | 1 | 58 | 0 | 0.248 | 0.400 | 0.352 |
| TB236 | 1 | NA | 0 | 0.356 | 0.264 | 0.380 |
| TB237 | 1 | 67 | 1 | 0.175 | 0.609 | 0.216 |
| TB238 | 1 | NA | 1 | 0.133 | 0.455 | 0.412 |
| TB239 | 1 | NA | 0 | 0.144 | 0.408 | 0.448 |

|        |   |    |   |       |       |       |
|--------|---|----|---|-------|-------|-------|
| TB240  | 1 | 36 | 0 | 0.134 | 0.332 | 0.534 |
| TB241  | 1 | NA | 1 | 0.152 | 0.322 | 0.526 |
| TB242  | 1 | NA | 1 | 0.169 | 0.526 | 0.305 |
| TB243  | 1 | NA | 0 | 0.055 | 0.511 | 0.435 |
| TB244  | 1 | 33 | 1 | 0.211 | 0.139 | 0.649 |
| TB245  | 1 | NA | 1 | 0.093 | 0.620 | 0.286 |
| TB246  | 1 | NA | 1 | 0.246 | 0.444 | 0.310 |
| TB247  | 1 | NA | 1 | 0.274 | 0.347 | 0.379 |
| TB248  | 1 | NA | 0 | 0.203 | 0.481 | 0.316 |
| TB249  | 1 | 26 | 1 | 0.347 | 0.342 | 0.310 |
| TB250  | 1 | 25 | 0 | 0.264 | 0.355 | 0.381 |
| TB251  | 1 | 36 | 1 | 0.300 | 0.432 | 0.267 |
| TB252  | 1 | 58 | 1 | 0.130 | 0.733 | 0.138 |
| TB253  | 1 | 22 | 0 | 0.330 | 0.515 | 0.155 |
| TB254  | 1 | 54 | 1 | 0.247 | 0.546 | 0.207 |
| TB255  | 1 | 75 | 0 | 0.649 | 0.200 | 0.151 |
| TB256  | 1 | 34 | 0 | 0.397 | 0.352 | 0.251 |
| TB257  | 1 | 23 | 0 | 0.305 | 0.323 | 0.372 |
| TB258  | 1 | 17 | 1 | 0.167 | 0.415 | 0.418 |
| TB259  | 1 | 2  | 1 | 0.294 | 0.332 | 0.374 |
| TB260  | 1 | 55 | 0 | 0.226 | 0.535 | 0.239 |
| TB261  | 1 | 69 | 1 | 0.262 | 0.313 | 0.425 |
| TB262  | 1 | 28 | 0 | 0.190 | 0.438 | 0.372 |
| TB263  | 1 | 37 | 1 | 0.175 | 0.406 | 0.419 |
| TB264  | 1 | 21 | 1 | 0.193 | 0.481 | 0.326 |
| TB265  | 1 | 4  | 1 | 0.148 | 0.320 | 0.533 |
| TB266  | 1 | NA | 1 | 0.203 | 0.628 | 0.168 |
| TB267  | 1 | 45 | 1 | 0.410 | 0.389 | 0.201 |
| TB268  | 1 | NA | 1 | 0.200 | 0.551 | 0.249 |
| TB269  | 1 | NA | 0 | 0.183 | 0.376 | 0.441 |
| TB270  | 1 | NA | 1 | 0.385 | 0.460 | 0.156 |
| TB271  | 1 | 25 | 0 | 0.159 | 0.391 | 0.450 |
| TB272  | 1 | 64 | 0 | 0.219 | 0.500 | 0.281 |
| TB273  | 1 | NA | 1 | 0.213 | 0.311 | 0.477 |
| TB274  | 1 | NA | 1 | 0.550 | 0.222 | 0.227 |
| TB275  | 1 | NA | 1 | 0.303 | 0.280 | 0.417 |
| TB276  | 1 | NA | 1 | 0.229 | 0.226 | 0.544 |
| TB277  | 1 | NA | 0 | 0.284 | 0.560 | 0.157 |
| TB278  | 1 | NA | 0 | 0.318 | 0.480 | 0.202 |
| TB279  | 1 | NA | 1 | 0.433 | 0.274 | 0.293 |
| TB280  | 1 | NA | 1 | 0.409 | 0.213 | 0.378 |
| CONT01 | 0 | 65 | 0 | 0.205 | 0.221 | 0.574 |
| CONT02 | 0 | 46 | 0 | 0.171 | 0.583 | 0.246 |
| CONT03 | 0 | 45 | 0 | 0.092 | 0.5   | 0.408 |
| CONT04 | 0 | 5  | 0 | 0.135 | 0.672 | 0.193 |
| CONT05 | 0 | 39 | 0 | 0.233 | 0.346 | 0.421 |
| CONT06 | 0 | 52 | 0 | 0.114 | 0.735 | 0.151 |
| CONT07 | 0 | 69 | 0 | 0.176 | 0.567 | 0.257 |

|        |   |    |   |       |       |       |
|--------|---|----|---|-------|-------|-------|
| CONT08 | 0 | 46 | 0 | 0.203 | 0.64  | 0.157 |
| CONT09 | 0 | 45 | 0 | 0.402 | 0.412 | 0.186 |
| CONT10 | 0 | 53 | 0 | 0.227 | 0.486 | 0.288 |
| CONT11 | 0 | 69 | 0 | 0.072 | 0.55  | 0.378 |
| CONT12 | 0 | 62 | 1 | 0.131 | 0.569 | 0.3   |
| CONT13 | 0 | 53 | 0 | 0.245 | 0.518 | 0.237 |
| CONT14 | 0 | 64 | 0 | 0.069 | 0.587 | 0.344 |
| CONT15 | 0 | 57 | 0 | 0.178 | 0.43  | 0.392 |
| CONT16 | 0 | 56 | 0 | 0.392 | 0.438 | 0.17  |
| CONT17 | 0 | 48 | 0 | 0.226 | 0.665 | 0.109 |
| CONT18 | 0 | 53 | 0 | 0.215 | 0.574 | 0.211 |
| CONT19 | 0 | 69 | 1 | 0.155 | 0.688 | 0.156 |
| CONT20 | 0 | 49 | 0 | 0.402 | 0.435 | 0.162 |
| CONT21 | 0 | 36 | 0 | 0.09  | 0.758 | 0.151 |
| CONT22 | 0 | 52 | 1 | 0.148 | 0.532 | 0.32  |
| CONT23 | 0 | 55 | 0 | 0.113 | 0.356 | 0.531 |
| CONT24 | 0 | 47 | 1 | 0.168 | 0.316 | 0.516 |
| CONT25 | 0 | 45 | 0 | 0.185 | 0.662 | 0.153 |
| CONT26 | 0 | 67 | 0 | 0.398 | 0.487 | 0.116 |
| CONT27 | 0 | 56 | 0 | 0.136 | 0.526 | 0.338 |
| CONT28 | 0 | 58 | 0 | 0.161 | 0.468 | 0.37  |
| CONT29 | 0 | 5  | 0 | 0.123 | 0.582 | 0.295 |
| CONT30 | 0 | 61 | 0 | 0.32  | 0.474 | 0.207 |
| CONT31 | 0 | 44 | 0 | 0.137 | 0.373 | 0.489 |
| CONT32 | 0 | 57 | 0 | 0.185 | 0.322 | 0.493 |
| CONT33 | 0 | 52 | 0 | 0.303 | 0.271 | 0.426 |
| CONT34 | 0 | 66 | 0 | 0.278 | 0.162 | 0.56  |
| CONT35 | 0 | 5  | 0 | 0.142 | 0.407 | 0.45  |
| CONT36 | 0 | 48 | 0 | 0.288 | 0.532 | 0.179 |
| CONT37 | 0 | 47 | 0 | 0.307 | 0.386 | 0.307 |
| CONT38 | 0 | 57 | 0 | 0.146 | 0.402 | 0.452 |
| CONT39 | 0 | 54 | 0 | 0.126 | 0.477 | 0.397 |
| CONT40 | 0 | 63 | 0 | 0.641 | 0.218 | 0.141 |
| CONT41 | 0 | 59 | 0 | 0.196 | 0.493 | 0.312 |
| CONT42 | 0 | 49 | 1 | 0.144 | 0.641 | 0.215 |
| CONT43 | 0 | 47 | 0 | 0.23  | 0.583 | 0.187 |
| CONT44 | 0 | 58 | 0 | 0.279 | 0.344 | 0.377 |
| CONT45 | 0 | 51 | 0 | 0.129 | 0.508 | 0.364 |
| CONT46 | 0 | 61 | 0 | 0.057 | 0.874 | 0.07  |
| CONT47 | 0 | 55 | 0 | 0.064 | 0.773 | 0.164 |
| CONT48 | 0 | 54 | 0 | 0.112 | 0.812 | 0.076 |
| CONT49 | 0 | 56 | 0 | 0.153 | 0.507 | 0.34  |
| CONT50 | 0 | 47 | 0 | 0.139 | 0.527 | 0.334 |
| CONT51 | 0 | 6  | 0 | 0.164 | 0.517 | 0.319 |
| CONT52 | 0 | 53 | 0 | 0.248 | 0.57  | 0.182 |
| CONT53 | 0 | 47 | 0 | 0.49  | 0.398 | 0.112 |
| CONT54 | 0 | 61 | 0 | 0.305 | 0.473 | 0.222 |
| CONT55 | 0 | 6  | 0 | 0.218 | 0.5   | 0.282 |

|         |   |    |   |       |       |       |
|---------|---|----|---|-------|-------|-------|
| CONT56  | 0 | 56 | 1 | 0.608 | 0.219 | 0.173 |
| CONT57  | 0 | 49 | 0 | 0.134 | 0.525 | 0.341 |
| CONT58  | 0 | 4  | 0 | 0.131 | 0.404 | 0.465 |
| CONT59  | 0 | 45 | 0 | 0.286 | 0.514 | 0.2   |
| CONT60  | 0 | 62 | 1 | 0.162 | 0.569 | 0.269 |
| CONT61  | 0 | 49 | 0 | 0.116 | 0.782 | 0.103 |
| CONT62  | 0 | 38 | 0 | 0.267 | 0.522 | 0.21  |
| CONT63  | 0 | 37 | 0 | 0.397 | 0.447 | 0.156 |
| CONT64  | 0 | 59 | 0 | 0.362 | 0.171 | 0.466 |
| CONT65  | 0 | 53 | 0 | 0.238 | 0.222 | 0.54  |
| CONT66  | 0 | 51 | 0 | 0.52  | 0.195 | 0.285 |
| CONT67  | 0 | 62 | 0 | 0.181 | 0.428 | 0.39  |
| CONT68  | 0 | 53 | 0 | 0.239 | 0.439 | 0.323 |
| CONT69  | 0 | 53 | 1 | 0.146 | 0.24  | 0.615 |
| CONT70  | 0 | 35 | 1 | 0.208 | 0.654 | 0.137 |
| CONT71  | 0 | 43 | 0 | 0.251 | 0.428 | 0.321 |
| CONT72  | 0 | 44 | 0 | 0.142 | 0.768 | 0.09  |
| CONT73  | 0 | 48 | 0 | 0.164 | 0.49  | 0.346 |
| CONT74  | 0 | NA | 0 | 0.226 | 0.276 | 0.498 |
| CONT75  | 0 | NA | 0 | 0.208 | 0.482 | 0.311 |
| CONT76  | 0 | 62 | 0 | 0.348 | 0.353 | 0.299 |
| CONT77  | 0 | 68 | 0 | 0.725 | 0.13  | 0.145 |
| CONT78  | 0 | 46 | 0 | 0.166 | 0.753 | 0.08  |
| CONT79  | 0 | 35 | 0 | 0.295 | 0.353 | 0.352 |
| CONT80  | 0 | 61 | 0 | 0.101 | 0.701 | 0.198 |
| CONT81  | 0 | 48 | 0 | 0.115 | 0.572 | 0.313 |
| CONT82  | 0 | 46 | 0 | 0.13  | 0.591 | 0.279 |
| CONT83  | 0 | 32 | 0 | 0.316 | 0.452 | 0.233 |
| CONT84  | 0 | 58 | 0 | 0.206 | 0.483 | 0.31  |
| CONT85  | 0 | 51 | 0 | 0.136 | 0.778 | 0.086 |
| CONT86  | 0 | 45 | 0 | 0.308 | 0.543 | 0.15  |
| CONT87  | 0 | 65 | 1 | 0.11  | 0.629 | 0.26  |
| CONT88  | 0 | 44 | 0 | 0.24  | 0.388 | 0.371 |
| CONT89  | 0 | 71 | 1 | 0.111 | 0.742 | 0.148 |
| CONT90  | 0 | 47 | 1 | 0.236 | 0.433 | 0.332 |
| CONT91  | 0 | 57 | 0 | 0.214 | 0.531 | 0.255 |
| CONT92  | 0 | 56 | 0 | 0.283 | 0.537 | 0.18  |
| CONT93  | 0 | 36 | 0 | 0.252 | 0.376 | 0.371 |
| CONT94  | 0 | 52 | 0 | 0.165 | 0.571 | 0.264 |
| CONT95  | 0 | 6  | 0 | 0.128 | 0.755 | 0.117 |
| CONT96  | 0 | 52 | 0 | 0.128 | 0.754 | 0.118 |
| CONT97  | 0 | 56 | 0 | 0.24  | 0.622 | 0.138 |
| CONT98  | 0 | 6  | 0 | 0.105 | 0.775 | 0.121 |
| CONT99  | 0 | 43 | 0 | 0.291 | 0.536 | 0.173 |
| CONT100 | 0 | 74 | 0 | 0.242 | 0.69  | 0.068 |
| CONT101 | 0 | 47 | 0 | 0.126 | 0.41  | 0.464 |
| CONT102 | 0 | 53 | 0 | 0.338 | 0.331 | 0.331 |
| CONT103 | 0 | 54 | 0 | 0.207 | 0.728 | 0.065 |



|         |   |    |   |       |       |       |
|---------|---|----|---|-------|-------|-------|
| CONT104 | 0 | 34 | 0 | 0.212 | 0.643 | 0.145 |
| CONT105 | 0 | 48 | 0 | 0.088 | 0.634 | 0.278 |
| CONT106 | 0 | 63 | 0 | 0.342 | 0.187 | 0.472 |
| CONT107 | 0 | 63 | 0 | 0.287 | 0.615 | 0.098 |
| CONT108 | 0 | 46 | 0 | 0.18  | 0.412 | 0.407 |
| CONT109 | 0 | 45 | 0 | 0.354 | 0.54  | 0.106 |
| CONT110 | 0 | 62 | 0 | 0.205 | 0.589 | 0.206 |
| CONT111 | 0 | 52 | 0 | 0.139 | 0.57  | 0.291 |
| CONT112 | 0 | 38 | 1 | 0.286 | 0.353 | 0.362 |
| CONT113 | 0 | 38 | 0 | 0.238 | 0.422 | 0.34  |
| CONT114 | 0 | 34 | 0 | 0.319 | 0.459 | 0.222 |
| CONT115 | 0 | 56 | 0 | 0.185 | 0.582 | 0.232 |
| CONT116 | 0 | 57 | 0 | 0.182 | 0.474 | 0.344 |
| CONT117 | 0 | 54 | 0 | 0.205 | 0.558 | 0.237 |
| CONT118 | 0 | 57 | 0 | 0.088 | 0.597 | 0.316 |
| CONT119 | 0 | 63 | 0 | 0.249 | 0.56  | 0.191 |
| CONT120 | 0 | 45 | 0 | 0.312 | 0.501 | 0.188 |
| CONT121 | 0 | 48 | 1 | 0.309 | 0.169 | 0.521 |
| CONT122 | 0 | 34 | 0 | 0.578 | 0.189 | 0.233 |
| CONT123 | 0 | 34 | 0 | 0.184 | 0.583 | 0.233 |
| CONT124 | 0 | 62 | 1 | 0.135 | 0.313 | 0.552 |
| CONT125 | 0 | 59 | 0 | 0.098 | 0.778 | 0.124 |
| CONT126 | 0 | 46 | 1 | 0.19  | 0.561 | 0.249 |
| CONT127 | 0 | NA | 0 | 0.133 | 0.1   | 0.767 |
| CONT128 | 0 | NA | 1 | 0.243 | 0.133 | 0.624 |
| CONT129 | 0 | NA | 0 | 0.107 | 0.455 | 0.438 |
| CONT130 | 0 | NA | 0 | 0.154 | 0.14  | 0.707 |
| CONT131 | 0 | 54 | 0 | 0.221 | 0.553 | 0.226 |
| CONT132 | 0 | 65 | 0 | 0.134 | 0.762 | 0.104 |
| CONT133 | 0 | NA | 1 | 0.142 | 0.442 | 0.416 |
| CONT134 | 0 | 32 | 1 | 0.18  | 0.618 | 0.202 |
| CONT135 | 0 | 58 | 0 | 0.112 | 0.676 | 0.212 |
| CONT136 | 0 | NA | 1 | 0.08  | 0.36  | 0.559 |
| CONT137 | 0 | NA | 1 | 0.172 | 0.54  | 0.287 |
| CONT138 | 0 | 47 | 0 | 0.137 | 0.711 | 0.152 |

---

NA- No annotation
